# Supplementary material for: Novel Genes Participating in the Formation of Prismatic and Nacreous Layers in the Pearl Oyster as Revealed by Their Tissue Distribution and RNA Interference Knockdown
Source: PubMed Central journal article supplement (PMC3893171; doi:10.1371/journal.pone.0084706), 2014-01-15
Supplement: pone.0084706.s003.pdf [file pone.0084706.s003.pdf]

**Table S2.** Sequences of gene specific primers used in 5'-RACE

| <b>Target Gene</b> | <b>Primer name</b> | <b>Primer sequence</b>      |
|--------------------|--------------------|-----------------------------|
| 000027             | 000027-R1          | 5'-TGGCTTACGCCAGTTAGCCT-3'  |
| 000031             | 000031-R1          | 5'-TGTCCAGAGACGTGAACAGT-3'  |
|                    | 000031-R2          | 5'-GGGTCATCATGTCTGAACCA-3'  |
| 000058             | 000058-R1          | 5'-TGTTTCGGGAGAGTCAGAAT-3'  |
|                    | 000058-R2          | 5'-GGTACTATTTACCCGGTCAT-3'  |
| 000066             | 000066-R1          | 5'-CGTGGGACCAGTAGTAGTTA-3'  |
| 000081             | 000081-R1          | 5'-CCACCACCTCCAGTCATACT-3'  |
| 000098             | 000098-R1          | 5'-GGTTTACACACAGGACAACA-3'  |
|                    | 000098-R2          | 5'-GGGAGAGGATCGGTACAAC-3'   |
| 000118             | 000118-R1          | 5'-GACTGCAAGCGATGTACAAG-3'  |
| 000133             | 000133-R1          | 5'-CTCGAGGTAACCGAACCAATT-3' |
| 000194             | 000194-R1          | 5'-CGGCGATGGACTGCCATAGT-3'  |
|                    | 000194-R2          | 5'-CGGGTGCTCTGTAGTAGGAT-3'  |
| 000200             | 000200-R1          | 5'-GGTGTCCGCCATGATGATAA-3'  |
|                    | 000200-R2          | 5'-TATCCAGAGCCAGAATACCG-3'  |
