# Supplementary material for: Novel Genes Participating in the Formation of Prismatic and Nacreous Layers in the Pearl Oyster as Revealed by Their Tissue Distribution and RNA Interference Knockdown
Source: PubMed Central journal article supplement (PMC3893171; doi:10.1371/journal.pone.0084706), 2014-01-15
Supplement: pone.0084706.s004.pdf [file pone.0084706.s004.pdf]

**Table S3.** Sequences of gene specific primers used in RT-PCR

| Target gene      | Primer sequence               |                                 | Amplicon size (bp) |
|------------------|-------------------------------|---------------------------------|--------------------|
|                  | Forward                       | Reverse                         |                    |
| 000027           | 5'-TCCCCGATTGAGGTCCGCAT-3'    | 5'-CTTCAGACCTAAGACGAGCA-3'      | 438                |
| 000031           | 5'-TGGTCAACAGGAGTCGGAG-3'     | 5'-TCTCCTCGCCGACCACCTTT-3'      | 517                |
| 000058           | 5'-TGACCCGAAGGCGTCATGCA-3'    | 5'-TGTTTCGGGAGAGTCAGAAT-3'      | 581                |
| 000066           | 5'-CCCTTACCGTATCCAAGAAA-3'    | 5'-TGGGACATCAACCACAGTCT-3'      | 562                |
| 000081           | 5'-CGGCGCACCGTCACGATATT-3'    | 5'-GCACAGCACACAGAGAATCT-3'      | 789                |
| 000096           | 5'-GCGGCCGCACTAGTGATTAA-3'    | 5'-CTAGAGCACTCGTATGCAAT-3'      | 411                |
| 000098           | 5'-TGTTGTCCTGTGTGTAACC-3'     | 5'-TTCTTCTTCCTGGTGCTGTA-3'      | 303                |
| Nacrein (000113) | 5'-GACTAGGTGCGCTAACCCCT-3'    | 5'-GGCCCCATTTTCAAAGTTGT-3'      | 511                |
| 000118           | 5'-CCGTGTCCAAACTCATTATCT-3'   | 5'-GCATACGCCATACACACATT-3'      | 344                |
| 000133           | 5'-GAATTGTTCCGGTTACCTCGA-3'   | 5'-GCCCAACCAGAGACAGCCTT-3'      | 516                |
| 000145           | 5'-GGGAAGAGAGAATGGCAGGA-3'    | 5'-GGCTACAGGATGCAAATGAA-3'      | 347                |
| 000194           | 5'-CATGGACTGGAAGGAGTAGA-3'    | 5'-TGGGGCCTTGTTTCGTCTTTT-3'     | 1331               |
| 000200           | 5'-TATCCAGAGCCAGAATACCG-3'    | 5'-GCCATACTCAATACGACAAA-3'      | 976                |
| MSI60 (000411)   | 5'-CAGGTGGTGGAGGAAGAGCA-3'    | 5'-GCCGTTATTTCCCCATCCAT-3'      | 559                |
| Pif              | 5'-ACACCGACTCATGGTCCGA-3'     | 5'-ATCGCCCGTGTGTTGCTTGA-3'      | 1258               |
| EF-1 $\alpha$    | 5'-GGCCACAGAGATTCATCAAGAAC-3' | 5'-CAACACCAGCAGCAATAATCAACAC-3' | 82                 |
